# Supplementary material for: Extracellular Alkalinization as a Defense Response in Potato Cells
Source: PubMed Central journal article supplement (PMC5258701; doi:10.3389/fpls.2017.00032), 2017-01-24
Supplement: Data_Sheet_1.pdf [file Data_Sheet_1.pdf]

Supplemental Figure S1

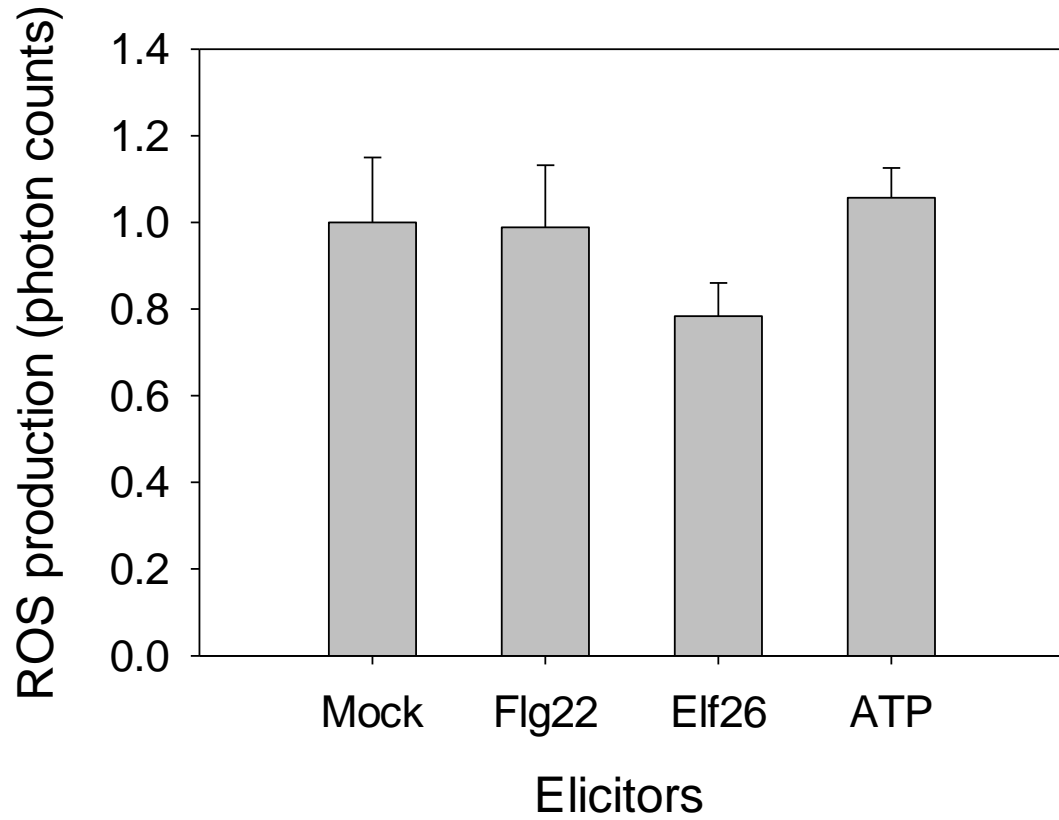

**Figure S1.** ROS accumulation was not induced in the presence of the elicitors Flg22, Elf26, and ATP. Histogram shows the normalized data with mean  $\pm$  SE ( $n = 6$ ) for total ROS production in 120 min upon addition of the elicitors 10  $\mu$ M of Flg22 or Elf26, or 0.5 mM of ATP in the potato cells.
